# Supplementary material for: New horizons on the knowledge of the population during the Middle/Late Pleistocene.The human remains ofGuattari Cave (S. Felice Circeo, Lt, Italy)
Source: Research Square preprint supplement (doi:10.21203/rs.3.rs-4158900/v1), 2024-03-27
Supplement: Supplementary file 1 [file fb21ad4bbc1f801e839d45db.xlsx]

## Sheet: Sheet1
								Human mtDNA
Sample	Sequencing ID#	File number	Description		Raw reads	reads >30 length cutadapt	% of raw	Number of seq aligned q30	% end	rmdup aligned q30	duplicate rate	Percent 5' C to T	Notes
MT_1CRA_2749	250380	1	Guattari_C10a	Upper 2nd Molar	2342645	2011091	85.847	455659	19.4506	1317	345.983	4.43686
MT_1CRA_2750	250381	2	Guattari_C10b	Upper 3rd Molar	1621270	998241	61.5715	238676	14.7215	708	337.113	11.1111	Suspicious length distribution, the 3' end has a G to T signal, which it should not
MT_1CRA_2751	250382	3	Guattari_C14	URPremolar fragment of crown	2745391	2159067	78.6433	824913	30.0472	2100	392.816	4.66926
MT_1CRA_2752	250383	4	Guattari_C11	L3rd molar good condition	2202751	1045283	47.4535	363384	16.4968	476	763.412	12.5	G to A again has a signal, which it should not
MT_1CRA_2753	250384	5	Guattari_C13	URC good condition glued	1537433	919483	59.8064	161847	10.5271	3564	45.4116	2.87425
MT_1CRA_2754	250385	6	Guattari_C15	Upper Molar incomplete	4670605	3759447	80.4916	1882083	40.2963	979	1922.45	4.68085
MT_1CRA_2755	250386	7	Guattari_C12	tooth broken in 4 parts	2399434	1854949	77.3078	991715	41.3312	4089	242.532	1.48305
MT_1CRA_2757	250388	9	Circeo 3_7144	mandible	5228330	4552846	87.0803	3294926	63.0206	3735	882.176	4.83271
pool_blanks_MT_1CRA	250391	11	Extraction blank		1070950	319341	29.8185	29184	2.72506	555	52.5838	4.31034
pool_blanks_MT_1CRA	250393	12	Library blank		845766	299155	35.3709	283	0.0334608	98	2.88776	0
pool_blanks_MT_1CRA	250394	13	Library blank		284237	95907	33.7419	105	0.036941	45	2.33333	11.1111
Sample		C to T											Length distribution
2750
2752
